# Supplementary material for: Tailoring the cationic lipid composition of lipo-DVDMS augments the phototherapy efficiency of burn infection
Source: Royal Society of Chemistry journal article supplement (doi:10.1039/d0bm01895c), 2021-01-01
Supplement: d0bm01895c1.pdf [file d0bm01895c1.pdf]

## Supplementary Material

**Title: Tailoring the Cationic Lipids Composition of Lipo-DVDMS  
Augments the Phototherapy Efficiency of Burn Infection**

**Authors:** *Bingjie Mai<sup>#</sup>, Yiru Gao<sup>#</sup>, Min Li, Mengqi Jia, Shupeii Liu,  
Xiaobing Wang, Kun Zhang, Quanhong Liu, Pan Wang\**

**Affiliation:** Key Laboratory of Medicinal Resources and Natural  
Pharmaceutical Chemistry, Ministry of Education, National Engineering  
Laboratory for Resource Developing of Endangered Chinese Crude Drugs  
in Northwest of China, College of Life Sciences, Shaanxi Normal  
University, Xi'an 710119, Shaanxi, China.

Corresponding author: Pan Wang

**E-mail:** Pan Wang, [wangpan@snnu.edu.cn](mailto:wangpan@snnu.edu.cn)

<sup>#</sup>The authors contributed equally to this work.

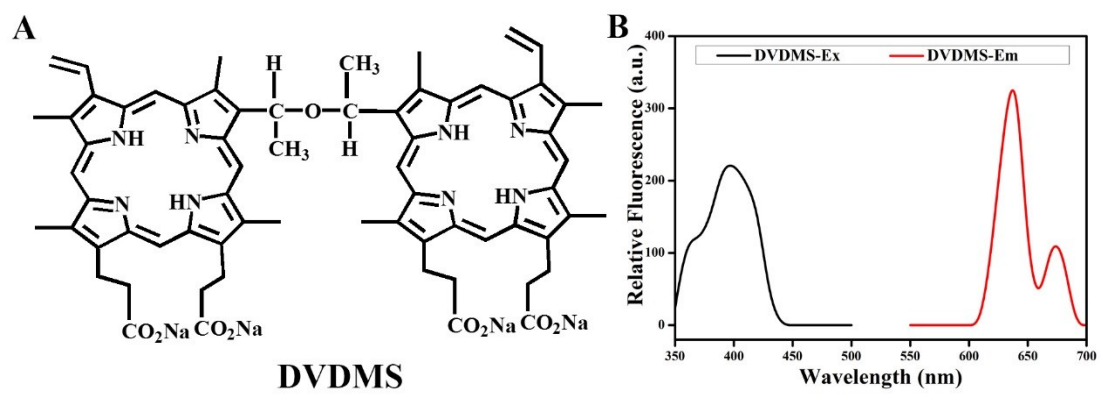

**Fig. S1.** Basic properties of photosensitizer DVDMS. (A) Chemical structure; (B) Fluorescence spectra.

**Table S1.** Entrapment Efficiency of different liposomes (DL, CDL1, CDL2, CDL3) at different drug to lipid ratios.

| <b>Drug to lipid ratio</b>       |      | <b>1:10</b> | <b>1:20</b> | <b>1:50</b> |
|----------------------------------|------|-------------|-------------|-------------|
| <b>Entrapment Efficiency (%)</b> | DL   | -           | -           | 51.6±1.6    |
|                                  | CDL1 | 71.6±0.41   | 83.9±0.39   | 89.9±0.84   |
|                                  | CDL2 | 83.7±0.63   | 86.2±1.06   | 90.0±0.27   |
|                                  | CDL3 | -           | -           | 74.2±0.78   |

**Table S2.** Drug loading of different liposomes (DL, CDL1, CDL2, CDL3).

| <b>Sample</b> | <b>Drug loading (%)</b> |
|---------------|-------------------------|
| DL            | $1.20 \pm 0.10$         |
| CDL1          | $4.35 \pm 0.14$         |
| CDL2          | $5.35 \pm 1.62$         |
| CDL3          | $1.52 \pm 0.07$         |

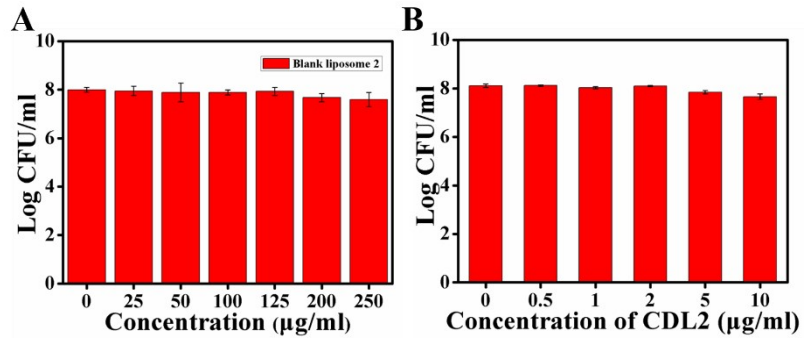

**Fig. S2.** Colony forming units of blank cationic liposome (A) and CDL2 (B) in *P. aeruginosa*.

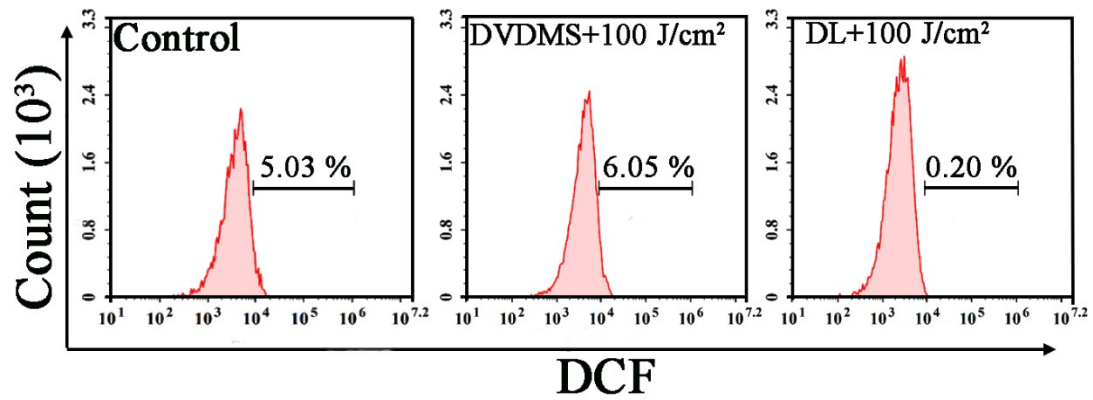

Fig. S3. ROS production of *P. aeruginosa* treated by DVDMS and DL mediated PACT.

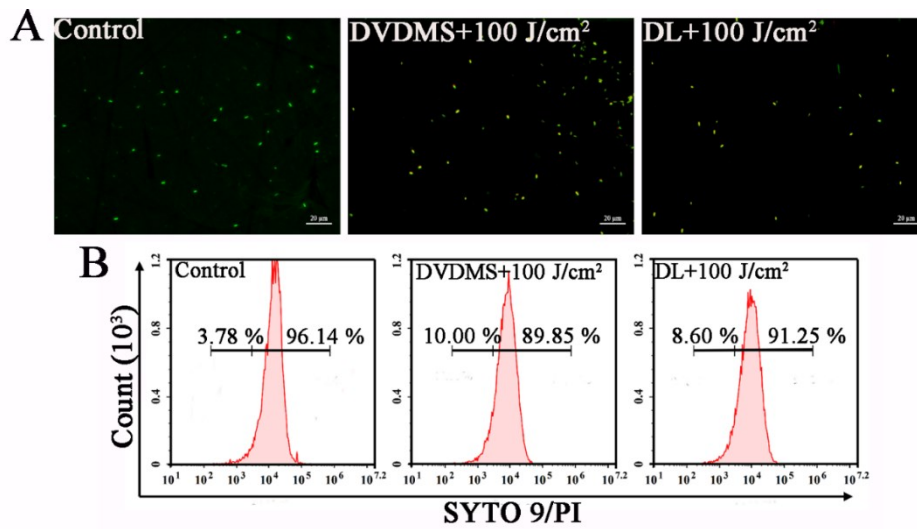

**Fig. S4.** SYTO 9/PI staining analyzed by fluorescence micrography (A) and flow cytometry (B). *P. aeruginosa* incubated with 10  $\mu\text{g/ml}$  DVDMS or DL combined with 100  $\text{J/cm}^2$  light.

**Table S3.** PCR reaction primer.

| Gene  | Primerdirection | Sequence (5' to 3')  |
|-------|-----------------|----------------------|
| rplu  | Forward         | CGCAGTGATTGTTACCGGTG |
|       | Reverse         | GGTAACCTTCGCACCTTCGA |
| Ndk   | Forward         | ACCCTGTCCATCATCAAGCC |
|       | Reverse         | GAACGGACGCTCTTTGTGC  |
| phzA2 | Forward         | ACTGGGAGTGGCACAACG   |
|       | Reverse         | GCAATTTCTGCATCGGGTT  |
| phzB1 | Forward         | ACGGCTGTGGCGGTTT     |
|       | Reverse         | CCGTGACCGTCGCATT     |



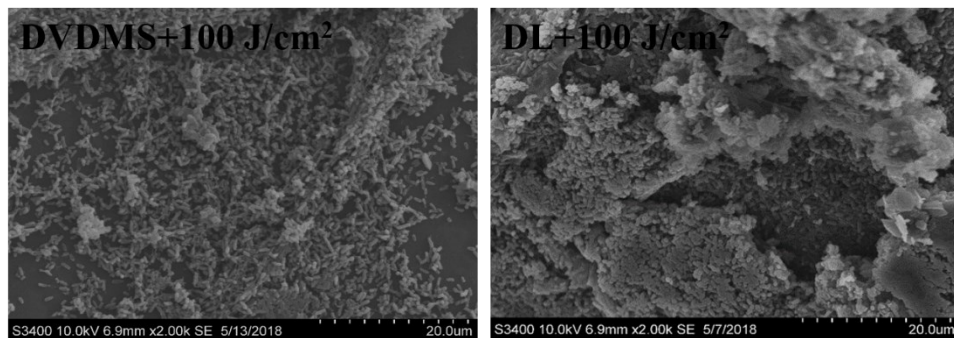

**Fig. S5.** SEM images of PACT-treated *P.aeruginosa* biofilms.

**Table S4.** Viscera weight of mice in each treatment group.

| <b>Groups</b>     | <b>Heart (g)</b> | <b>Liver (g)</b> | <b>Spleen (g)</b> | <b>Lung (g)</b> | <b>Kidney (g)</b> |
|-------------------|------------------|------------------|-------------------|-----------------|-------------------|
| <b>Model</b>      | 0.131 ± 0.031    | 1.174 ± 0.165    | 0.180 ± 0.026     | 0.129 ± 0.020   | 0.124 ± 0.003     |
| <b>DVDMS-PACT</b> | 0.120 ± 0.002    | 1.054 ± 0.049    | 0.149 ± 0.020     | 0.166 ± 0.020   | 0.111 ± 0.009     |
| <b>DL-PACT</b>    | 0.131 ± 0.019    | 1.093 ± 0.098    | 0.142 ± 0.001     | 0.149 ± 0.005   | 0.127 ± 0.001     |
| <b>CDL2-PACT</b>  | 0.138 ± 0.001    | 1.108 ± 0.149    | 0.119 ± 0.013     | 0.150 ± 0.027   | 0.127 ± 0.007     |
